# Supplementary material for: PreTIS: A Tool to Predict Non-canonical 5’ UTR Translational Initiation Sites in Human and Mouse
Source: PLoS Comput Biol. 2016 Oct 21;12(10):e1005170. doi: 10.1371/journal.pcbi.1005170 (PMC5074520; doi:10.1371/journal.pcbi.1005170)
Supplement: S6 Fig — Mutation matrices showing the impact of the flanking sequence context of all putative start sites of gene GIMAP5 on the predicted initiation confidence. In each case, only one nucleotide is mutated with respect to the reference sequence (top line). Grey means that the start was predicted as true translational start (predicted initiation confidence is greater than 0.54) whereas white means that the start was classified as false start. Mutations at the start sites itself were not considered. The numbers reflect the predicted initiation confidence. (PDF) [file pcbi.1005170.s006.pdf]

[illegible]

|      |   | CUG at position -36 |      |      |      |      |      |      |      |      |      |      |      |      |      |      |      |   |   |      |      |      |      |      |      |      |      |      |      |      |
|------|---|---------------------|------|------|------|------|------|------|------|------|------|------|------|------|------|------|------|---|---|------|------|------|------|------|------|------|------|------|------|------|
|      |   | -15                 | -14  | -13  | -12  | -11  | -10  | -9   | -8   | -7   | -6   | -5   | -4   | -3   | -2   | -1   | 2    | 3 | 4 | 5    | 6    | 7    | 8    | 9    | 10   | 11   | 12   | 13   |      |      |
|      |   | C                   | U    | A    | G    | U    | A    | U    | C    | A    | U    | C    | C    | A    | C    | C    | C    | U | G | A    | U    | C    | A    | C    | A    | G    | G    | G    |      |      |
| SNPs | A | 0.80                | 0.80 |      |      | 0.80 | 0.83 | 0.82 |      | 0.73 | 0.84 | 0.82 | 0.81 | 0.84 |      | 0.85 | 0.83 |   |   | 0.80 |      | 0.82 | 0.86 |      |      | 0.83 |      | 0.86 | 0.89 | 0.85 |
|      | C | 0.81                |      | 0.80 | 0.84 | 0.83 | 0.81 | 0.75 |      | 0.80 | 0.82 |      |      | 0.87 |      |      |      |   |   | 0.78 | 0.81 | 0.82 | 0.86 | 0.78 | 0.79 |      | 0.80 | 0.82 | 0.81 | 0.83 |
|      | U |                     | 0.79 | 0.79 |      | 0.77 |      | 0.78 | 0.78 | 0.78 |      | 0.76 | 0.80 | 0.74 | 0.80 | 0.80 |      |   |   |      | 0.73 |      |      |      | 0.77 | 0.79 | 0.73 |      |      |      |
|      | G |                     |      | 0.76 | 0.78 | 0.83 | 0.81 | 0.82 | 0.80 |      | 0.84 | 0.83 | 0.81 | 0.74 | 0.83 | 0.80 |      |   |   | 0.74 | 0.77 | 0.86 | 0.86 | 0.81 | 0.80 | 0.77 | 0.83 | 0.83 | 0.84 |      |

|   |     | GUG at position -48 |      |      |      |      |      |      |      |      |      |      |      |      |      |      |      |   |      |      |      |      |      |      |      |      |      |      |      |      |
|---|-----|---------------------|------|------|------|------|------|------|------|------|------|------|------|------|------|------|------|---|------|------|------|------|------|------|------|------|------|------|------|------|
|   |     | -15                 | -14  | -13  | -12  | -11  | -10  | -9   | -8   | -7   | -6   | -5   | -4   | -3   | -2   | -1   | 1    | 2 | 3    | 4    | 5    | 6    | 7    | 8    | 9    | 10   | 11   | 12   | 13   |      |
|   |     | G                   | C    | G    | C    | G    | C    | A    | G    | A    | G    | C    | U    | C    | A    | G    | A    | U | A    | A    | C    | U    | U    | G    | C    | C    | A    | C    | C    |      |
| A | SUP | 0.58                | 0.58 | 0.64 | 0.67 | 0.61 | 0.62 |      | 0.64 |      | 0.57 | 0.57 | 0.62 | 0.69 | 0.62 |      | 0.57 |   |      |      | 0.62 | 0.58 | 0.65 | 0.60 | 0.61 |      | 0.61 | 0.63 | 0.64 |      |
| C | SUP |                     | 0.51 | 0.44 |      |      | 0.53 | 0.63 | 0.58 | 0.55 |      |      | 0.55 |      | 0.57 |      |      |   | 0.53 |      | 0.58 | 0.58 | 0.62 |      |      | 0.56 |      |      |      |      |
| G | SUP |                     |      | 0.56 |      |      | 0.55 | 0.61 | 0.56 | 0.54 |      | 0.52 | 0.56 | 0.62 | 0.51 | 0.55 |      |   |      | 0.65 | 0.53 | 0.57 |      |      | 0.54 | 0.56 | 0.53 | 0.56 | 0.57 |      |
| U | SUP |                     |      |      | 0.50 | 0.64 | 0.60 | 0.59 | 0.51 | 0.61 | 0.58 | 0.50 | 0.60 | 0.57 |      | 0.55 | 0.55 |   |      | 0.54 | 0.55 |      |      |      | 0.66 | 0.59 | 0.59 | 0.58 | 0.60 | 0.61 |

|      |   | CUG at position -77 |      |             |             |      |      |      |      |      |      |      |             |      |      |      |      |      |   |   |      |             |      |      |      |      |      |      |      |      |
|------|---|---------------------|------|-------------|-------------|------|------|------|------|------|------|------|-------------|------|------|------|------|------|---|---|------|-------------|------|------|------|------|------|------|------|------|
|      |   | -15                 | -14  | -13         | -12         | -11  | -10  | -9   | -8   | -7   | -6   | -5   | -4          | -3   | -2   | -1   | 1    | 2    | 3 | 4 | 5    | 6           | 7    | 8    | 9    | 10   | 11   | 12   | 13   |      |
| SNPs | A | 0.44                | 0.64 | 0.42        | <b>0.65</b> | 0.41 | 0.44 | 0.42 | 0.42 | 0.42 | 0.40 | 0.44 | <b>0.58</b> | 0.46 | 0.44 |      |      |      |   |   | 0.49 |             | 0.47 | 0.47 | 0.48 | 0.48 | 0.45 | 0.43 |      |      |
|      | C | 0.43                | 0.64 |             |             | 0.41 | 0.38 | 0.42 |      | 0.42 | 0.40 |      | <b>0.52</b> | 0.64 | 0.44 |      |      |      |   |   | 0.57 | 0.49        | 0.42 | 0.46 | 0.42 | 0.45 | 0.48 | 0.45 |      |      |
|      | G | 0.41                |      | <b>0.40</b> | <b>0.58</b> | 0.38 | 0.45 | 0.38 | 0.37 | 0.40 | 0.42 | 0.40 | 0.42        | 0.40 | 0.38 | 0.49 | 0.36 | 0.40 |   |   |      | <b>0.48</b> |      |      | 0.42 | 0.37 |      | 0.38 | 0.39 | 0.40 |
|      | U |                     | 0.45 | 0.41        | <b>0.62</b> | 0.42 | 0.43 |      |      | 0.43 | 0.43 | 0.43 | 0.44        | 0.38 |      | 0.39 |      |      |   |   |      | <b>0.38</b> | 0.42 | 0.45 | 0.45 | 0.42 | 0.47 | 0.47 | 0.41 | 0.43 |

|      |   | CUG at position -96 |      |      |      |      |      |      |      |      |      |      |      |      |      |      |      |   |   |   |      |      |      |      |      |      |      |      |      |      |      |
|------|---|---------------------|------|------|------|------|------|------|------|------|------|------|------|------|------|------|------|---|---|---|------|------|------|------|------|------|------|------|------|------|------|
|      |   | -15                 | -14  | -13  | -12  | -11  | -10  | -9   | -8   | -7   | -6   | -5   | -4   | -3   | -2   | -1   | 1    | 2 | 3 | 4 | 5    | 6    | 7    | 8    | 9    | 10   | 11   | 12   | 13   |      |      |
|      |   | A                   | G    | A    | G    | A    | G    | A    | G    | A    | G    | A    | G    | A    | G    | A    | C    | U | C | G | C    | U    | G    | C    | A    | G    | A    | C    | U    | C    |      |
| SNPs | A |                     | 0.54 |      | 0.60 | 0.55 |      | 0.60 | 0.60 |      | 0.57 | 0.52 | 0.54 | 0.57 | 0.51 | 0.59 | 0.62 |   |   |   | 0.62 | 0.63 | 0.57 | 0.56 | 0.56 |      | 0.59 | 0.55 | 0.59 | 0.58 |      |
|      | G | 0.57                |      | 0.54 | 0.52 | 0.38 | 0.53 | 0.52 | 0.62 | 0.54 |      | 0.54 | 0.57 | 0.51 | 0.51 |      |      |   |   |   | 0.60 | 0.55 |      | 0.56 |      | 0.54 |      | 0.56 | 0.54 |      |      |
| SNPs | C | 0.52                | 0.52 |      | 0.52 | 0.50 | 0.54 |      | 0.52 | 0.59 | 0.49 | 0.50 | 0.54 | 0.48 | 0.57 |      |      |   |   |   | 0.83 | 0.55 |      | 0.51 | 0.51 | 0.51 | 0.51 | 0.53 | 0.50 | 0.51 | 0.53 |
|      | U | 0.53                | 0.53 | 0.53 | 0.50 | 0.57 | 0.53 | 0.61 | 0.48 | 0.61 | 0.57 | 0.57 | 0.51 | 0.53 |      |      |      |   |   |   | 0.87 | 0.56 | 0.53 | 0.54 | 0.54 | 0.56 | 0.56 | 0.56 | 0.56 | 0.56 | 0.56 |

|      |   | ACG at position -115 |      |      |      |      |      |      |      |      |      |    |      |      |      |      |      |      |   |   |   |      |   |      |      |      |      |      |      |      |      |      |  |
|------|---|----------------------|------|------|------|------|------|------|------|------|------|----|------|------|------|------|------|------|---|---|---|------|---|------|------|------|------|------|------|------|------|------|--|
|      |   | -15                  | -14  | -13  | -12  | -11  | -10  | -9   | -8   | -7   | -6   | -5 | -4   | -3   | -2   | -1   | 1    | 2    | 3 | 4 | 5 | 6    | 7 | 8    | 9    | 10   | 11   | 12   | 13   |      |      |      |  |
|      |   | C                    | A    | U    | C    | C    | C    | C    | G    | C    | A    | -5 | -4   | -3   | -2   | -1   | 1    | A    | 2 | 3 | 4 | C    | A | G    | 7    | 8    | 9    | C    | A    | G    | G    | A    |  |
| SNPs | A |                      |      |      |      |      |      |      |      |      |      |    |      |      |      |      |      |      |   |   |   |      |   |      |      |      |      |      |      |      |      |      |  |
|      | C | 0.12                 | 0.15 | 0.14 | 0.36 | 0.14 | 0.16 | 0.22 | 0.17 | 0.18 | 0.12 |    |      |      | 0.30 |      | 0.18 |      |   |   |   | 0.16 |   | 0.14 |      | 0.16 | 0.14 |      | 0.19 | 0.20 |      |      |  |
|      | G |                      |      |      |      |      |      |      |      |      |      |    |      |      | 0.12 |      | 0.12 |      |   |   |   |      |   | 0.09 | 0.14 | 0.13 | 0.18 |      | 0.12 | 0.17 | 0.16 | 0.11 |  |
|      | U | 0.10                 | 0.13 | 0.16 | 0.20 | 0.00 | 0.11 | 0.14 | 0.16 |      |      |    | 0.12 | 0.15 | 0.10 | 0.09 | 0.21 | 0.02 |   |   |   |      |   | 0.19 | 0.05 |      | 0.06 | 0.10 | 0.08 |      |      | 0.10 |  |

*GUG at position -138*

|   | -15  | -14  | -13  | -12  | -11  | -10  | -9   | -8   | -7   | -6   | -5   | -4   | -3   | -2   | -1   | 1 | 2 | 3 | 4 | 5    | 6    | 7    | 8    | 9    | 10   | 11   | 12   | 13 |
|---|------|------|------|------|------|------|------|------|------|------|------|------|------|------|------|---|---|---|---|------|------|------|------|------|------|------|------|----|
|   | A    | C    | A    | C    | U    | C    | C    | C    | A    | G    | C    | C    | C    | C    | U    | G | U | G | A | A    | C    | A    | C    | A    | U    | A    | C    | C  |
| A |      |      |      |      |      |      |      |      |      |      |      |      |      |      |      |   |   |   |   |      |      |      |      |      |      |      |      |    |
| C | 0.42 | 0.42 | 0.44 | 0.43 | 0.44 | 0.46 | 0.40 | 0.42 | 0.40 | 0.42 | 0.42 | 0.43 | 0.39 | 0.45 | 0.47 |   |   |   |   |      | 0.42 |      | 0.48 | 0.43 | 0.43 | 0.47 | 0.46 |    |
| G | 0.43 |      |      | 0.22 |      |      | 0.41 |      | 0.38 | 0.44 |      |      |      |      | 0.45 |   |   |   |   |      | 0.42 |      | 0.40 | 0.46 | 0.43 | 0.42 |      |    |
| U | 0.44 | 0.43 | 0.41 | 0.38 | 0.41 | 0.45 | 0.36 | 0.38 | 0.40 | 0.43 | 0.36 | 0.51 | 0.36 | 0.42 |      |   |   |   |   | 0.44 | 0.36 | 0.41 | 0.36 | 0.38 | 0.38 | 0.42 | 0.42 |    |
| C | 0.44 | 0.43 | 0.40 |      | 0.42 | 0.44 | 0.46 |      | 0.41 | 0.43 | 0.48 | 0.39 | 0.44 | 0.42 |      |   |   |   |   | 0.38 | 0.37 | 0.43 | 0.40 | 0.45 | 0.41 | 0.44 | 0.44 |    |

[illegible]

|      |   | AUG at position -181 |      |      |      |      |      |      |      |      |      |      |      |      |      |      |      |   |   |   |      |      |      |      |      |      |      |      |      |      |
|------|---|----------------------|------|------|------|------|------|------|------|------|------|------|------|------|------|------|------|---|---|---|------|------|------|------|------|------|------|------|------|------|
|      |   | -15                  | -14  | -13  | -12  | -11  | -10  | -9   | -8   | -7   | -6   | -5   | -4   | -3   | -2   | -1   | 1    | 2 | 3 | 4 | 5    | 6    | 7    | 8    | 9    | 10   | 11   | 12   | 13   |      |
|      |   | U                    | U    | U    | U    | A    | G    | G    | C    | C    | C    | A    | G    | C    | A    | C    | A    | U | G | G | U    | C    | U    | U    | U    | U    | U    | U    | U    |      |
| SNPs | A | 0.56                 | 0.66 | 0.57 | 0.58 | 0.65 | 0.71 | 0.65 | 0.68 | 0.68 | 0.66 | 0.69 | 0.82 | 0.70 |      |      |      |   |   |   | 0.51 | 0.65 | 0.65 | 0.68 | 0.67 | 0.70 | 0.59 | 0.67 | 0.59 | 0.67 |
|      | C | 0.57                 | 0.67 | 0.60 |      | 0.63 | 0.62 |      |      |      |      | 0.56 | 0.67 |      |      |      |      |   |   |   | 0.55 |      | 0.64 |      |      | 0.66 |      |      | 0.54 | 0.65 |
|      | G | 0.65                 | 0.64 | 0.55 | 0.81 | 0.51 | 0.59 |      | 0.67 | 0.62 | 0.54 | 0.69 | 0.50 |      | 0.74 | 0.56 | 0.56 |   |   |   |      |      | 0.66 | 0.54 | 0.62 | 0.64 | 0.53 | 0.62 | 0.52 | 0.64 |
|      | U |                      |      |      |      | 0.63 | 0.63 | 0.64 | 0.72 | 0.66 | 0.69 | 0.66 | 0.56 | 0.65 | 0.57 | 0.63 | 0.63 |   |   |   | 0.56 | 0.60 |      | 0.66 | 0.57 |      | 0.58 | 0.68 |      |      |

|      |   | CUG at position -210 |      |      |      |      |      |      |      |      |      |      |      |      |      |      |   |   |   |   |      |      |      |      |      |      |      |      |      |
|------|---|----------------------|------|------|------|------|------|------|------|------|------|------|------|------|------|------|---|---|---|---|------|------|------|------|------|------|------|------|------|
|      |   | -15                  | -14  | -13  | -12  | -11  | -10  | -9   | -8   | -7   | -6   | -5   | -4   | -3   | -2   | -1   | 1 | 2 | 3 | 4 | 5    | 6    | 7    | 8    | 9    | 10   | 11   | 12   | 13   |
|      |   | U                    | U    | U    | U    | U    | U    | U    | U    | U    | U    | U    | U    | C    | C    | A    | C | G | G | A | G    | G    | C    | A    | A    | U    | U    | A    | G    |
| SNPs | A | 0.48                 | 0.46 | 0.47 | 0.68 | 0.45 | 0.48 | 0.47 | 0.39 | 0.46 | 0.50 | 0.48 | 0.52 | 0.62 | 0.49 | 0.48 |   |   |   |   |      | 0.54 | 0.43 | 0.47 |      | 0.06 | 0.48 | 0.51 | 0.48 |
|      | C | 0.47                 | 0.46 | 0.47 |      | 0.46 | 0.56 | 0.41 |      | 0.48 | 0.48 | 0.56 | 0.47 | 0.51 |      | 0.41 |   |   |   |   | 0.42 | 0.52 | 0.45 | 0.44 | 0.64 | 0.48 | 0.51 | 0.41 | 0.47 |
|      | G | 0.44                 | 0.44 | 0.45 |      | 0.43 | 0.46 | 0.42 | 0.62 | 0.42 |      | 0.41 |      | 0.53 | 0.35 |      |   |   |   |   |      |      |      | 0.43 | 0.63 | 0.40 | 0.22 |      | 0.39 |
|      | U |                      |      |      | 0.64 |      |      |      |      | 0.46 |      | 0.48 | 0.48 | 0.40 | 0.43 |      |   |   |   |   | 0.42 | 0.49 |      | 0.47 | 0.44 |      | 0.50 | 0.50 | 0.43 |

|      |   | UUG at position -218 |      |      |      |      |      |      |      |      |      |      |      |      |      |      |   |   |   |      |      |      |      |      |      |      |      |      |      |      |
|------|---|----------------------|------|------|------|------|------|------|------|------|------|------|------|------|------|------|---|---|---|------|------|------|------|------|------|------|------|------|------|------|
|      |   | -15                  | -14  | -13  | -12  | -11  | -10  | -9   | -8   | -7   | -6   | -5   | -4   | -3   | -2   | -1   | 1 | 2 | 3 | 4    | 5    | 6    | 7    | 8    | 9    | 10   | 11   | 12   | 13   |      |
|      |   | U                    | C    | U    | C    | U    | A    | C    | U    | U    | U    | U    | U    | C    | U    | U    | U | U | G | U    | G    | C    | A    | G    | U    | U    | G    | A    | G    |      |
| SHPs | A | 0.26                 | 0.26 | 0.27 | 0.49 | 0.26 | 0.33 | 0.27 | 0.27 | 0.26 | 0.24 | 0.26 | 0.44 | 0.32 | 0.32 |      |   |   |   | 0.31 | 0.36 | 0.29 | 0.28 | 0.32 | 0.30 |      |      |      |      |      |
|      | C | 0.26                 |      | 0.27 |      | 0.26 | 0.26 |      | 0.28 | 0.27 | 0.27 | 0.26 | 0.27 | 0.30 | 0.30 |      |   |   |   | 0.32 | 0.33 |      | 0.25 | 0.31 | 0.28 | 0.31 | 0.22 | 0.27 |      |      |
|      | U | 0.28                 | 0.16 | 0.26 | 0.41 | 0.24 | 0.25 | 0.29 | 0.23 | 0.23 | 0.27 | 0.29 | 0.21 | 0.36 | 0.21 | 0.27 |   |   |   |      |      |      |      |      |      |      |      |      |      |      |
|      | G | 0.26                 |      | 0.26 |      | 0.45 | 0.26 | 0.33 |      |      |      |      | 0.22 |      |      |      |   |   |   |      |      | 0.29 | 0.28 | 0.26 | 0.31 | 0.27 |      | 0.32 | 0.25 | 0.29 |

[illegible]

| GUG at position -253 |   |      |      |      |      |      |      |      |      |      |      |      |      |      |      |      |      |   |   |      |      |      |      |      |      |      |      |      |      |
|----------------------|---|------|------|------|------|------|------|------|------|------|------|------|------|------|------|------|------|---|---|------|------|------|------|------|------|------|------|------|------|
|                      |   | -15  | -14  | -13  | -12  | -11  | -10  | -9   | -8   | -7   | -6   | -5   | -4   | -3   | -2   | -1   | 1    | 2 | 3 | 4    | 5    | 6    | 7    | 8    | 9    | 10   | 11   | 12   | 13   |
|                      |   | C    | U    | A    | G    | U    | C    | C    | G    | C    | A    | G    | A    | G    | A    | G    | U    | G | G | G    | G    | A    | C    | A    | C    | A    | C    | A    | C    |
| SNPs                 | A | 0.49 | 0.50 | 0.56 | 0.49 | 0.51 | 0.58 | 0.53 | 0.52 |      | 0.51 | 0.58 | 0.57 | 0.53 |      |      |      |   |   | 0.43 | 0.53 | 0.50 | 0.54 |      | 0.51 |      | 0.51 |      | 0.53 |
|                      | G |      | 0.50 | 0.50 | 0.34 | 0.50 |      | 0.54 |      | 0.48 | 0.52 | 0.48 | 0.30 | 0.56 | 0.50 |      |      |   |   | 0.39 | 0.55 | 0.49 | 0.53 | 0.50 |      | 0.49 |      | 0.46 |      |
|                      | C |      | 0.48 | 0.49 | 0.48 |      | 0.44 | 0.49 | 0.52 |      | 0.48 | 0.49 |      | 0.43 |      | 0.48 |      |   |   |      |      |      |      | 0.45 | 0.47 | 0.44 | 0.46 | 0.43 | 0.50 |
|                      | U |      | 0.49 |      | 0.48 | 0.53 |      | 0.51 | 0.55 | 0.56 | 0.50 | 0.49 | 0.52 | 0.43 | 0.30 | 0.54 |      |   |   |      | 0.40 | 0.48 | 0.53 | 0.54 | 0.49 | 0.50 | 0.49 | 0.51 | 0.48 |
| AGG at position -257 |   |      |      |      |      |      |      |      |      |      |      |      |      |      |      |      |      |   |   |      |      |      |      |      |      |      |      |      |      |
|                      |   | -15  | -14  | -13  | -12  | -11  | -10  | -9   | -8   | -7   | -6   | -5   | -4   | -3   | -2   | -1   | 1    | 2 | 3 | 4    | 5    | 6    | 7    | 8    | 9    | 10   | 11   | 12   | 13   |
|                      |   | U    | G    | U    | C    | C    | U    | A    | G    | U    | C    | C    | G    | A    | G    | A    | G    | G | U | G    | U    | G    | G    | G    | G    | A    | C    |      |      |
| SNPs                 | A | 0.00 | 0.00 | 0.00 | 0.00 | 0.00 | 0.00 | 0.00 | 0.00 | 0.00 | 0.00 | 0.00 | 0.00 | 0.00 | 0.00 | 0.00 |      |   |   |      | 0.00 | 0.00 | 0.00 | 0.00 | 0.00 | 0.00 | 0.00 | 0.00 |      |
|                      | G |      | 0.00 | 0.00 | 0.00 |      | 0.00 | 0.00 | 0.00 | 0.00 |      |      | 0.00 | 0.00 | 0.00 | 0.00 |      |   |   |      | 0.00 | 0.00 | 0.00 | 0.00 | 0.00 | 0.00 | 0.00 | 0.00 |      |
|                      | C |      |      | 0.00 | 0.00 | 0.00 | 0.00 | 0.00 |      |      | 0.00 | 0.00 | 0.00 |      | 0.00 | 0.00 |      |   |   |      |      | 0.00 | 0.00 | 0.00 | 0.00 | 0.00 | 0.00 | 0.00 |      |
|                      | U |      |      |      | 0.00 | 0.00 | 0.00 | 0.00 |      | 0.00 | 0.00 | 0.00 | 0.00 | 0.00 | 0.00 | 0.00 | 0.00 |   |   |      |      |      | 0.00 | 0.00 |      |      | 0.00 | 0.00 |      |

|      |   | GUG at position -255 |      |      |      |      |      |      |      |      |      |      |      |      |      |      |   |   |   |   |      |      |      |      |      |      |      |      |      |      |
|------|---|----------------------|------|------|------|------|------|------|------|------|------|------|------|------|------|------|---|---|---|---|------|------|------|------|------|------|------|------|------|------|
|      |   | -15                  | -14  | -13  | -12  | -11  | -10  | -9   | -8   | -7   | -6   | -5   | -4   | -3   | -2   | -1   | 1 | 2 | 3 | 4 | 5    | 6    | 7    | 8    | 9    | 10   | 11   | 12   | 13   |      |
|      |   | U                    | C    | C    | U    | A    | G    | U    | C    | C    | G    | C    | A    | G    | A    | G    | G | U | G | U | G    | U    | G    | G    | A    | C    | A    | C    | A    |      |
| SNPs | A | 0.56                 | 0.56 | 0.57 | 0.62 |      | 0.58 | 0.56 | 0.56 | 0.60 | 0.57 | 0.57 |      | 0.64 | 0.61 |      |   |   |   |   | 0.62 | 0.64 | 0.57 | 0.61 | 0.62 | 0.61 |      | 0.58 | 0.60 |      |
|      | C | 0.57                 |      |      | 0.39 | 0.56 | 0.56 | 0.51 |      |      | 0.56 |      | 0.54 | 0.50 | 0.55 | 0.60 |   |   |   |   | 0.58 | 0.61 | 0.57 | 0.60 | 0.61 | 0.60 | 0.56 | 0.54 |      |      |
|      | G | 0.55                 | 0.54 | 0.56 | 0.55 | 0.51 |      | 0.52 | 0.51 | 0.55 |      | 0.52 | 0.52 |      | 0.48 |      |   |   |   |   |      |      |      |      |      |      | 0.52 | 0.53 | 0.51 | 0.57 |
|      | U |                      | 0.57 | 0.56 |      | 0.55 | 0.57 |      | 0.57 | 0.58 | 0.59 | 0.56 | 0.53 | 0.50 | 0.54 | 0.58 |   |   |   |   |      | 0.62 | 0.61 | 0.62 | 0.62 | 0.60 | 0.56 | 0.58 | 0.55 | 0.59 |
